# Supplementary material
Source: Springer Nature journal article supplement (https://www.springermedizin.de/resource/supplementary/12885_2011_2646_MOESM2_ESM.pdf/9461620)

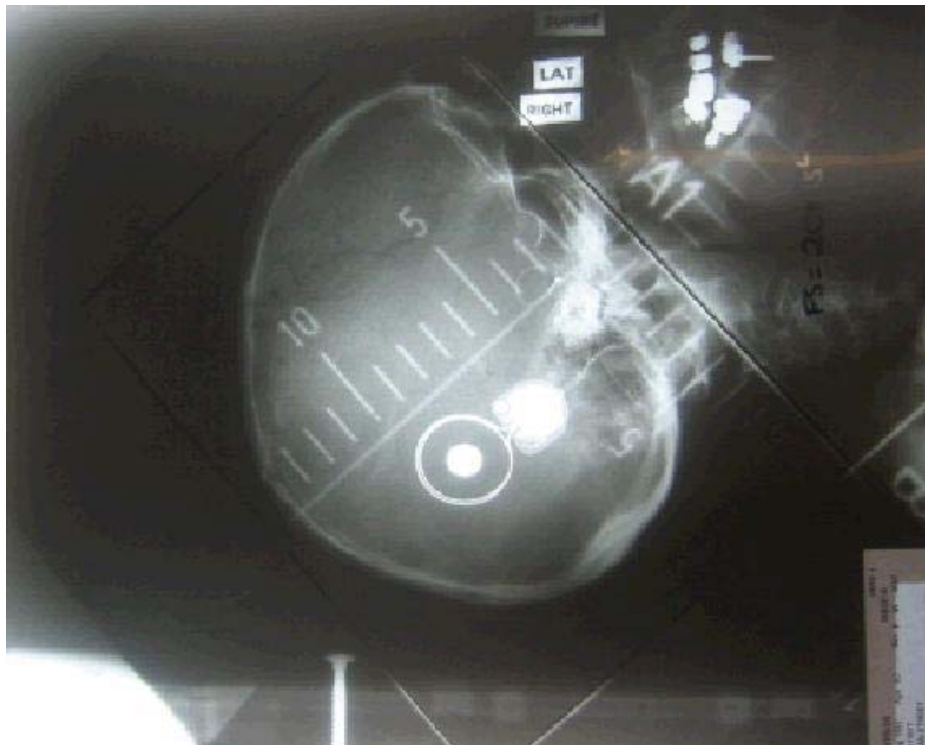

Supplement: MOESM2 [file 9461620]
